# Supplementary material for: Polyoxometalate catalysts with co-substituted VO2+and transition metals and their catalytic performance for the oxidation of isobutane
Source: Royal Society of Chemistry journal article supplement (doi:10.1039/c8cy01101j), 2018-01-01
Supplement: c8cy01101j1.pdf [file c8cy01101j1.pdf]

**Supporting information**

**Polyoxometalate catalysts with co-substitution of VO<sup>2+</sup> and transition  
metals and their catalytic performance in isobutane oxidation**

Yanchun Liu,<sup>a</sup> Jingfang He,<sup>a,b</sup> Wenling Chu,<sup>\*a</sup> Weishen Yang,<sup>\*a</sup>

## Supplementary Figures and Tables

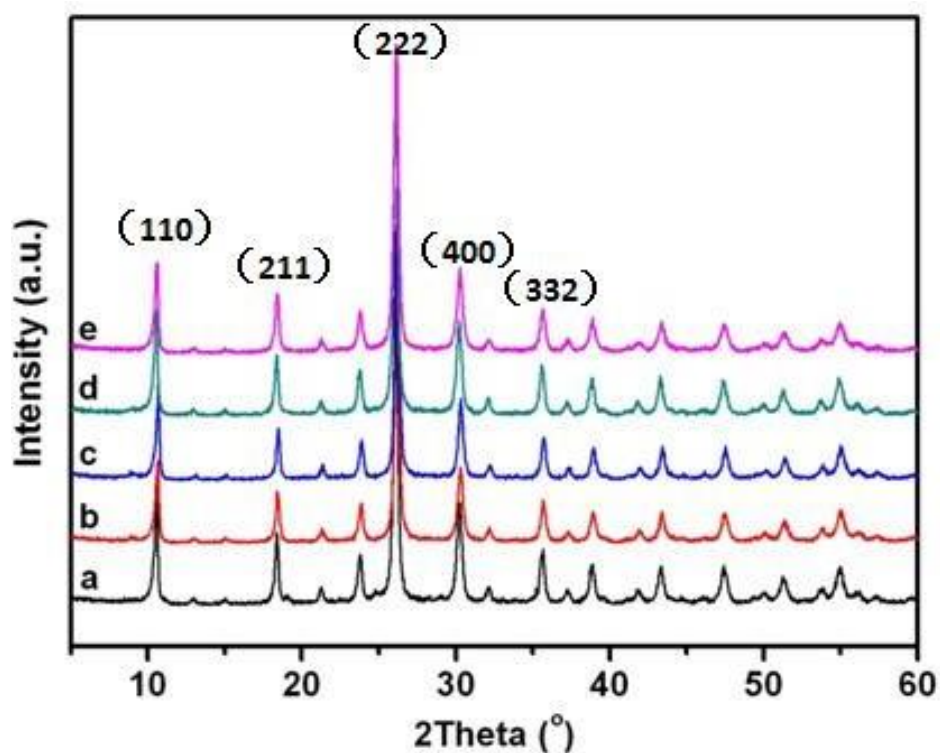

Figure.S1 XRD patterns of V-containing Cs-salt of HPCs with the incorporation of different transition metals. a:  $\text{Cs}_{2.0}\text{V}_{0.3}\text{Cu}_{0.2}\text{PMo}_{12}\text{O}_{40}$ ; b:  $\text{Cs}_{2.0}\text{V}_{0.2}\text{Fe}_{0.2}\text{PMo}_{12}\text{O}_{40}$ ; c:  $\text{Cs}_{2.0}\text{V}_{0.2}\text{Ce}_{0.2}\text{PMo}_{12}\text{O}_{40}$ ; d:  $\text{Cs}_{2.0}\text{V}_{0.3}\text{Ni}_{0.2}\text{PMo}_{12}\text{O}_{40}$ ; e:  $\text{Cs}_{2.0}\text{Cu}_{0.2}\text{PMo}_{11}\text{VO}_{40}$

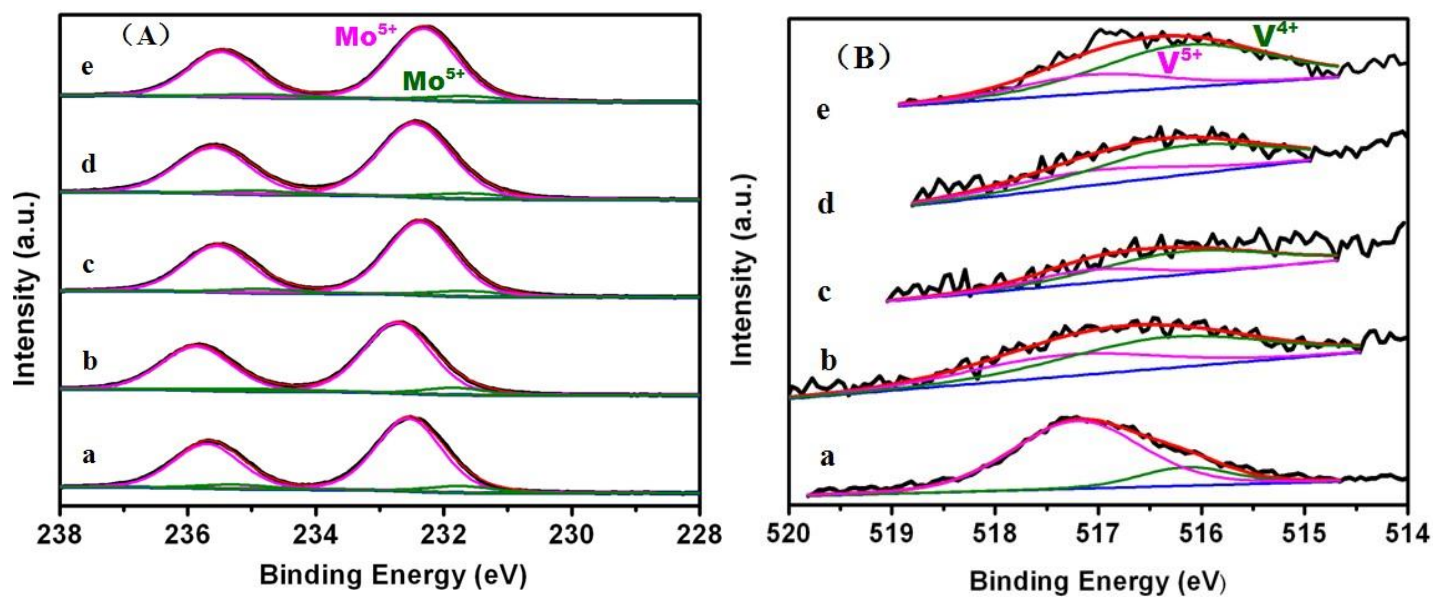

**Figure S2 XPS spectra of Mo 3d (A) and V 2p (B) for V-containing Cs-salt of HPCs with the incorporation of different transition metals. a:  $\text{Cs}_{2.0}\text{Cu}_{0.2}\text{PMo}_{11}\text{VO}_{40}$ ; b:  $\text{Cs}_{2.0}\text{V}_{0.3}\text{Cu}_{0.2}\text{PMo}_{12}\text{O}_{40}$ ; c:  $\text{Cs}_{2.0}\text{V}_{0.2}\text{Fe}_{0.2}\text{PMo}_{12}\text{O}_{40}$ ; d:  $\text{Cs}_{2.0}\text{V}_{0.2}\text{Ce}_{0.2}\text{PMo}_{12}\text{O}_{40}$ ; e:  $\text{Cs}_{2.0}\text{V}_{0.3}\text{Ni}_{0.2}\text{PMo}_{12}\text{O}_{40}$**

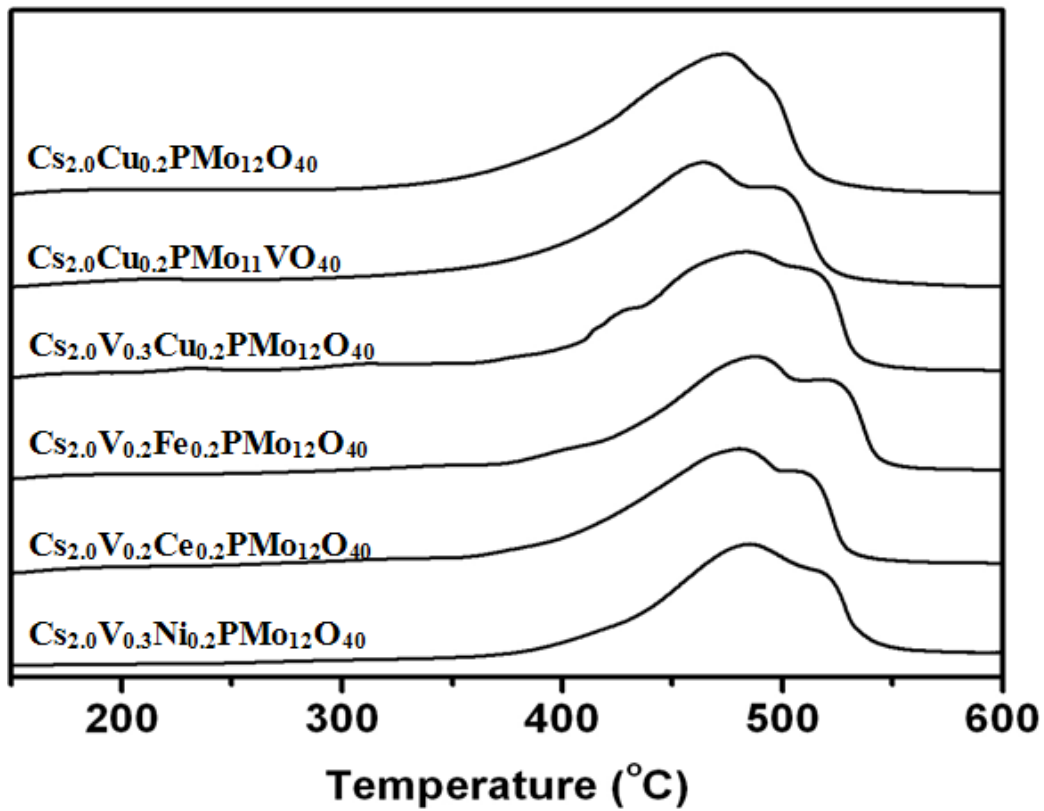

Figure.S3 NH<sub>3</sub>-TPD patterns of Cs salt of V-containing HPC with the incorporation of different transition metals.

**Table S1 Chemical analysis of the catalysts after calcination at 300°C**

| Catalysts                                                                              | Atomic ratio |                              |      |      |
|----------------------------------------------------------------------------------------|--------------|------------------------------|------|------|
|                                                                                        | Cs/P         | M/P<br>(M=Cu, Fe, Ni, or Ce) | V/P  | Mo/P |
| Cs <sub>2.0</sub> V <sub>0.3</sub> Cu <sub>0.2</sub> PMo <sub>12</sub> O <sub>40</sub> | 2.02         | 0.21                         | 0.30 | 11.6 |
| Cs <sub>2.0</sub> Cu <sub>0.2</sub> PMo <sub>11</sub> VO <sub>4</sub>                  | 2.00         | 0.24                         | 1.10 | 11.0 |
| Cs <sub>2.0</sub> V <sub>0.3</sub> Ni <sub>0.2</sub> PMo <sub>12</sub> O <sub>4</sub>  | 1.94         | 0.22                         | 0.29 | 11.6 |
| Cs <sub>2.0</sub> V <sub>0.2</sub> Fe <sub>0.2</sub> PMo <sub>12</sub> O <sub>4</sub>  | 1.99         | 0.24                         | 0.22 | 12.1 |
| Cs <sub>2.0</sub> V <sub>0.2</sub> Ce <sub>0.2</sub> PMo <sub>12</sub> O <sub>4</sub>  | 1.90         | 0.23                         | 0.24 | 12.8 |

**Table S2 Adsorption amount of NH<sub>3</sub> on the surface of Cs salt of V-containing HPC with the incorporation of different transition metals.**

| Catalysts                                                                              | Adsorption amount of NH <sub>3</sub> (mmol/g) |            |            | Total acidity<br>(mmol/g) |
|----------------------------------------------------------------------------------------|-----------------------------------------------|------------|------------|---------------------------|
|                                                                                        | 150~350 °C                                    | 350~450 °C | 450~600 °C |                           |
| Cs <sub>2.0</sub> Cu <sub>0.2</sub> PMo <sub>12</sub> O <sub>40</sub>                  | 0.1094                                        | 0.5714     | 0.7437     | 1.4245                    |
| Cs <sub>2.0</sub> V <sub>0.3</sub> PMo <sub>12</sub> O <sub>40</sub> *                 | 0.0294                                        | 0.5732     | 0.5610     | 1.1636                    |
| Cs <sub>2.0</sub> V <sub>0.3</sub> Cu <sub>0.2</sub> PMo <sub>12</sub> O <sub>40</sub> | 0.1191                                        | 0.6248     | 0.9018     | 1.6457                    |
| Cs <sub>2.0</sub> Cu <sub>0.2</sub> PMo <sub>11</sub> VO <sub>4</sub>                  | 0.1676                                        | 0.5255     | 0.7240     | 1.4171                    |
| Cs <sub>2.0</sub> V <sub>0.3</sub> Ni <sub>0.2</sub> PMo <sub>12</sub> O <sub>4</sub>  | 0.0565                                        | 0.3888     | 0.9349     | 1.3802                    |
| Cs <sub>2.0</sub> V <sub>0.2</sub> Fe <sub>0.2</sub> PMo <sub>12</sub> O <sub>4</sub>  | 0.1133                                        | 0.3417     | 0.9512     | 1.4052                    |
| Cs <sub>2.0</sub> V <sub>0.2</sub> Ce <sub>0.2</sub> PMo <sub>12</sub> O <sub>4</sub>  | 0.1548                                        | 0.4059     | 0.8314     | 1.3921                    |

\* : From our previous study in Appl. Catal. A. Gen., 2018, 556:104-112
